# Supplementary material
Source: PubMed Central journal article supplement (PMC2710038)
Supplement: mmc1.pdf [file mmc1.pdf]

**Supplementary Material**

**Monitoring of an RNA Multistep Folding Pathway by Isothermal Titration Calorimetry**

Cédric Reymond, Martin Bisailon, and Jean-Pierre Perreault

### **Electrophoretic mobility shift assay (EMSA)**

EMSA analyses were performed with the collection of mutated ribozymes. Briefly, trace amounts of 5'-end-<sup>32</sup>P-labeled substrates were incubated with 0.2 nM - 50 nM of mutated ribozyme in a final volume 10  $\mu$ L containing 50 mM Tris-borate (pH 7.5) and 10 mM MgCl<sub>2</sub>. The samples were incubated at 25°C for 90 min, and then loading dye (50% glycerol, 0.025% bromophenol blue and 0.025% xylene cyanol) added. The samples were then fractionated on native 20% polyacrylamide gels (29:1 ratio of acrylamide to bisacrylamide) using 50 mM Tris-borate (pH 7.5) and 10 mM MgCl<sub>2</sub> solution for both gel preparation and running buffer. The gels were run at 4°C for 18 h at 90 V, exposed to phosphor screens, scanned and analyzed using a PhosphorImager program (Molecular Dynamics). The fractions of bound substrate were determined, and both the K<sub>D</sub> and the Gibbs free energy were then calculated (i.e.  $\Delta G = -RT \ln K_D$ , where  $\Delta G$  is the change in Gibbs free energy, T the absolute temperature and R the universal gas constant). All of the measurements were performed on a minimum of two independent experiments.

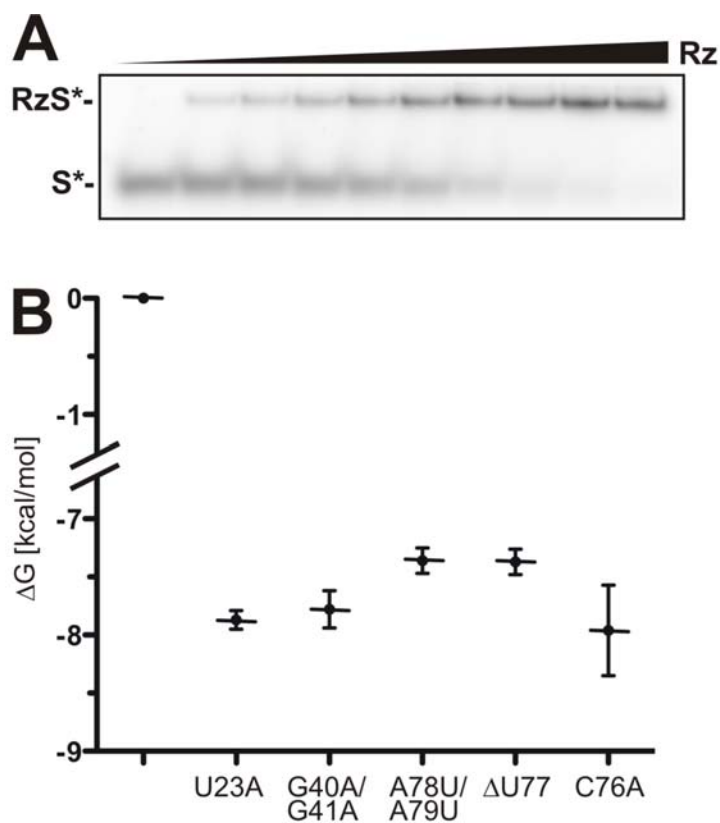

**Results of electrophoretic mobility shift assays experiments.** (A) Typical autoradiogram of an EMSA assay performed for the Rz-C76A mutant. (B)  $\Delta G$  values obtained with the various mutants.

**TABLE S1: Data from binding shift assays performed with the HDV ribozymes.**

| Mutant           | $\Delta H$ [kcal / mol] | $T\Delta S$ [kcal / mol] | $\Delta G$ [kcal / mol] |
|------------------|-------------------------|--------------------------|-------------------------|
| Rz-U23A          | $-2.73 \pm 0.19$        | $3.10 \pm 0.11$          | $-5.83 \pm 0.05$        |
| Rz-G40A/G41A     | $-3.95 \pm 0.21$        | $1.68 \pm 0.24$          | $-5.62 \pm 0.06$        |
| Rz-A78U/A79U     | $-3.15 \pm 0.54$        | $2.06 \pm 0.78$          | $-5.18 \pm 0.13$        |
| Rz- $\Delta$ U77 | $-5.04 \pm 1.29$        | $0.17 \pm 0.10$          | $-5.21 \pm 0.06$        |
| Rz-C76A          | $-5.30 \pm 0.78$        | $0.87 \pm 0.14$          | $-6.17 \pm 0.13$        |
